# Supplementary material
Source: publisher figshare collection journal article supplement (https://frontiersin.figshare.com/ndownloader/files/34891185)
Supplement: Supplementary file 1 [file 34891185]

Supplementary Material

The chloride salt for the demonstration solar loop at Oak Ridge National Laboratory was provided by AICL Magnesium. The supplier assessed the salt as having the composition MgCl2 (48.8 weight %) – KCl (40.8 weight %) – NaCl (3.8 weight %). Details are given in Table 1. The salt composition was used to guide the mixtures tested in this purification process.

Supplementary Table 1. Analysis of Dehydrated Carnallite by AICL Magnesium

| Component | Specifications  Min-Max weight% | Sample 1 (weight %) | Sample 2 (weight %) |
| --- | --- | --- | --- |
| MgCl2 | 44 – 50 | 49.0 | 48.7 |
| KCl | 38 – 43 | 40.5 | 41.0 |
| K2O calculated from KCl |  | 25.6 | 25.9 |
| NaCl | 2.5 – 10 | 3.8 | 3.8 |
| MgO | 1.5 – 2.5 | 1.69 | 1.58 |
| H2O | 3.5 – 4.5 | 4.5 | 4.3 |
| SO42- | 0.05 (max) | 0.019 | 0.020 |
| Br | 0.6 (max) | 0.55 | 0.58 |
| B | 0.0001 – 0.0002 | 0.0001 | 0.0001 |
| Insoluble residue | 0.01 (max) | < 0.01 | < 0.01 |
| Mg/K mole ratio |  | 0.94 | 0.94 |


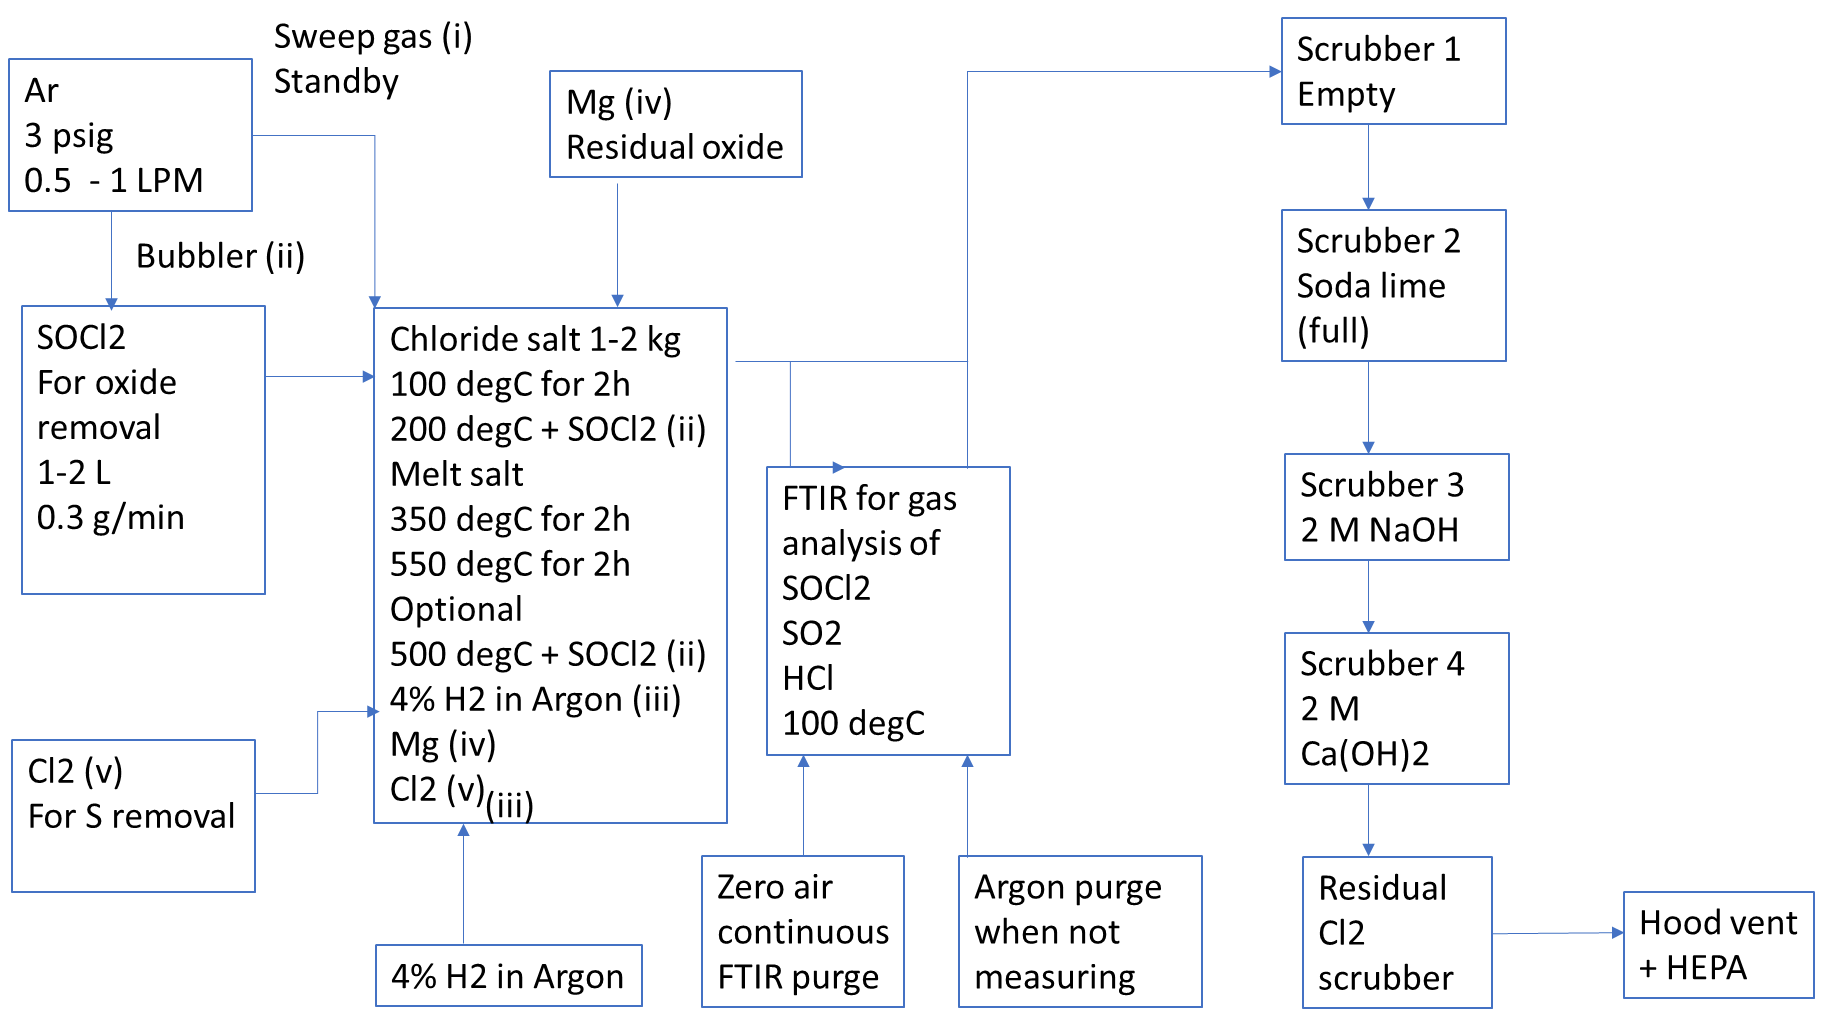


Supplementary Figure 1. Flow chart for thionyl chloride purification process.
